# Supplementary material for: A framework for studying behavioral evolution by reconstructing ancestral repertoires
Source: eLife journal article supplement (doi:10.7554/elife.61806), 2021-09-02

*D. yakuba*

*D. santomea*

*D. sechellia*

Mean species behavior (Log)

Mean of inferred species behavior (Log)

*D. simulans*

*D. mauritiana*

*D. melanogaster*

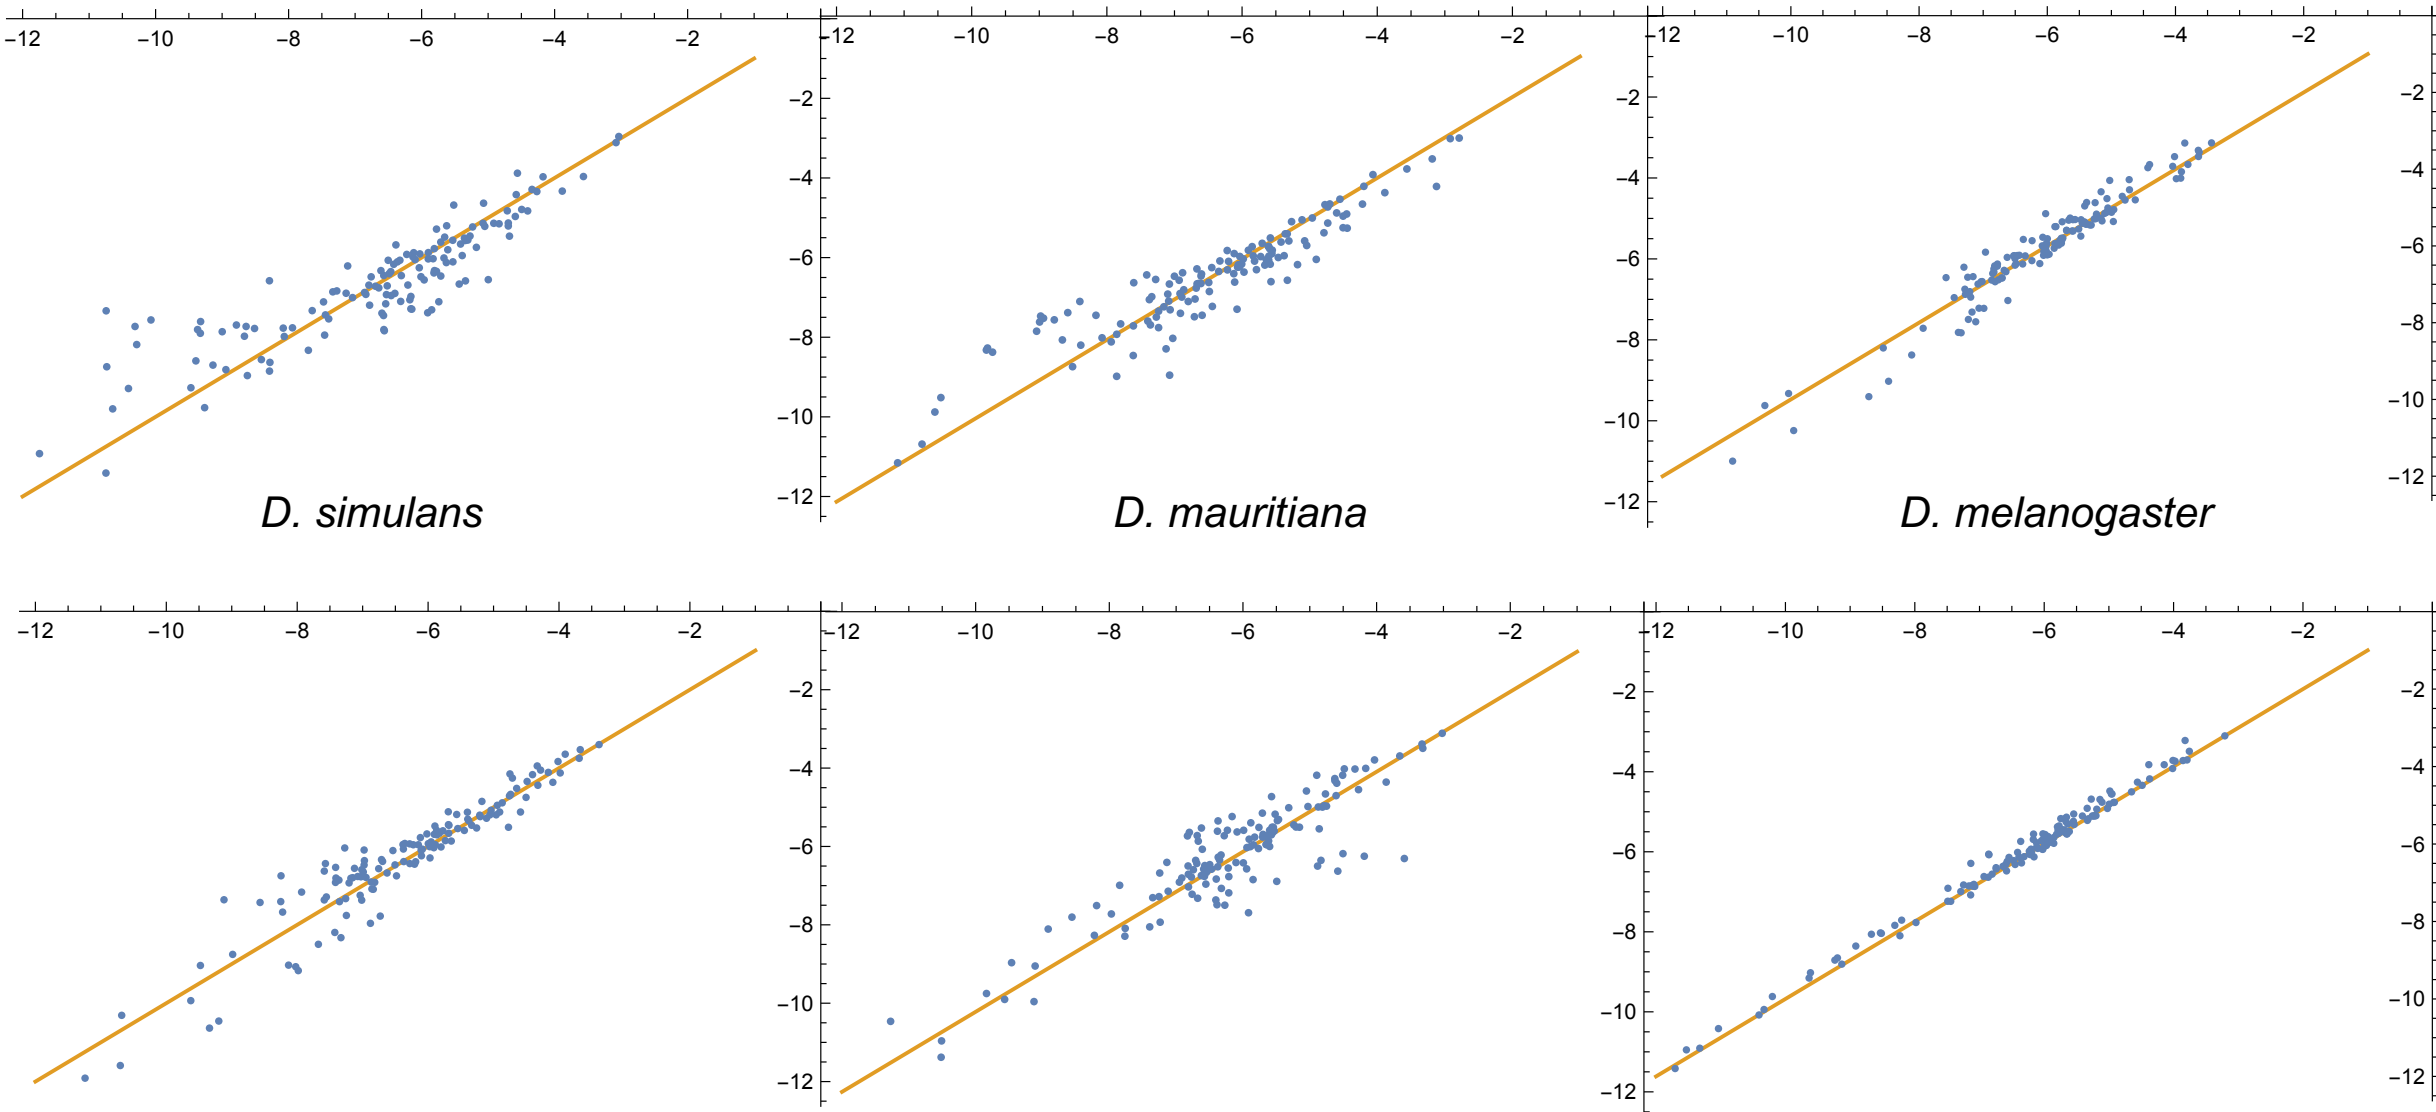

Supplement: supp [file elife-61806-supp-v1.zip]
