# Supplementary figures and images for: A framework for studying behavioral evolution by reconstructing ancestral repertoires
Source: eLife journal article supplement (doi:10.7554/elife.61806), 2021-09-02

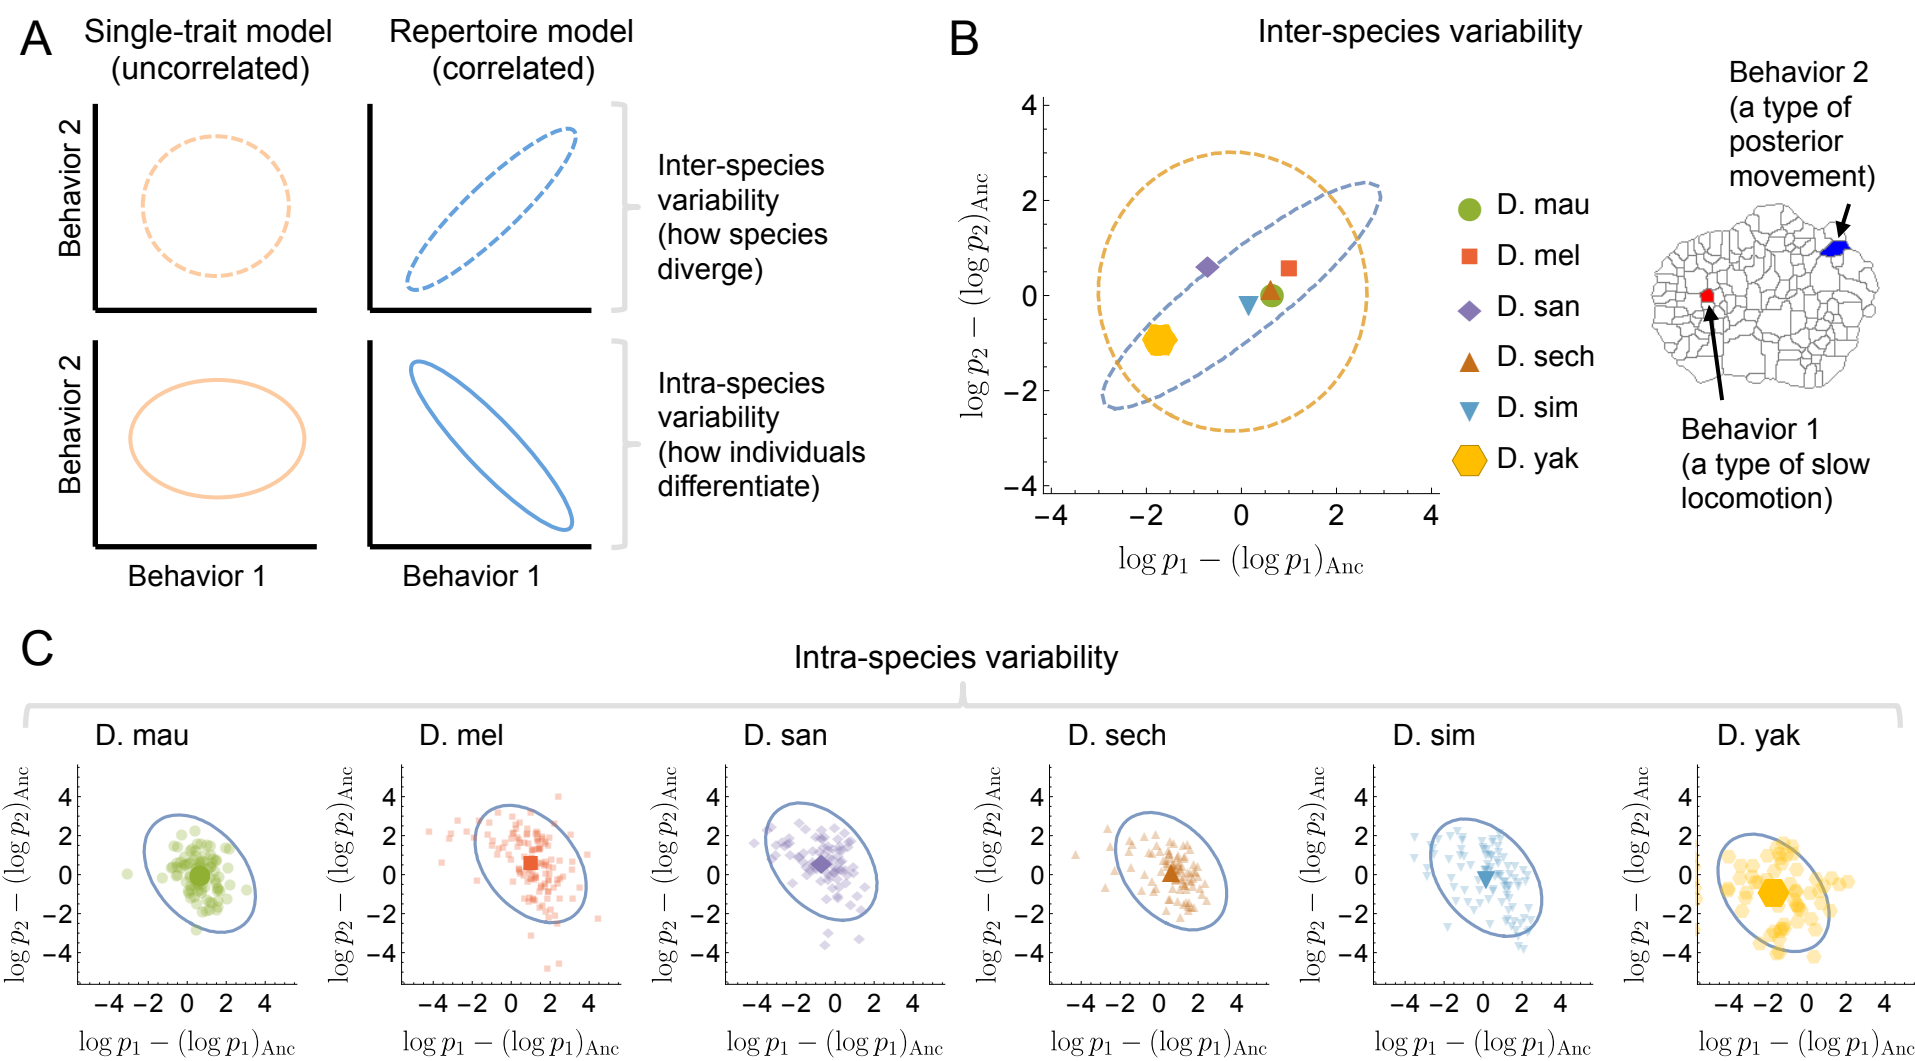

Supplement: supp [file elife-61806-supp-v1.zip]

A

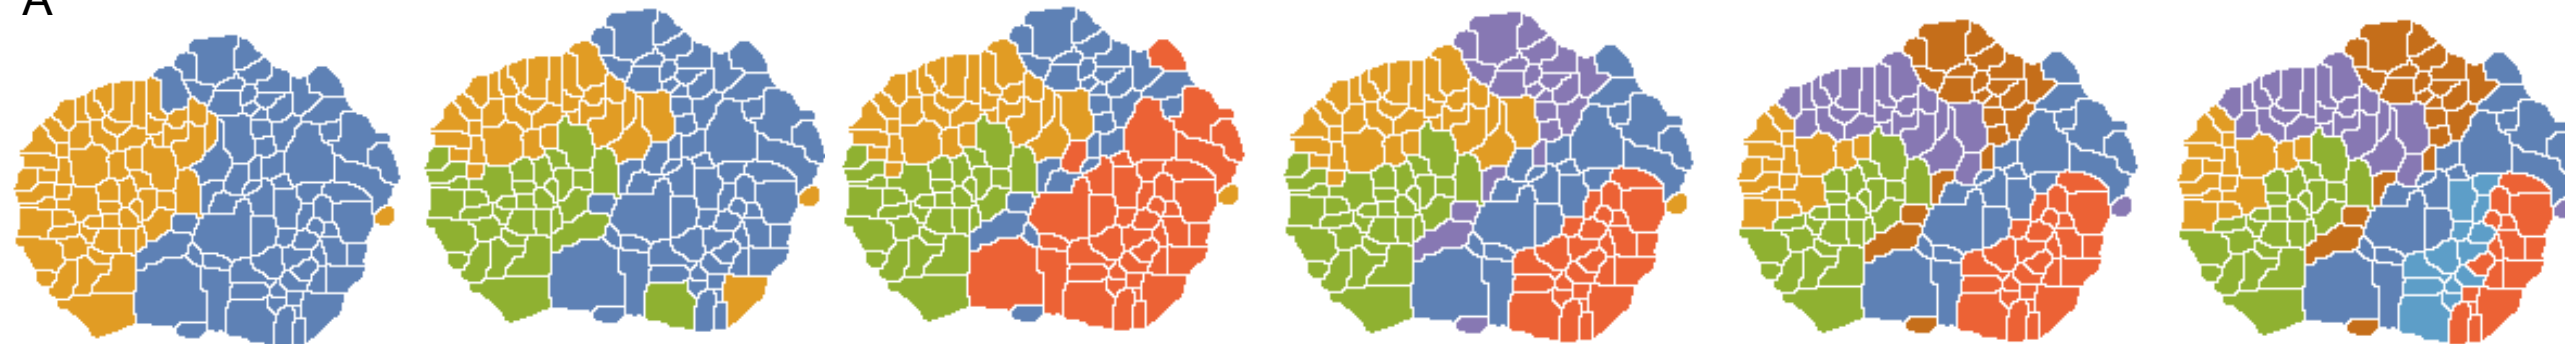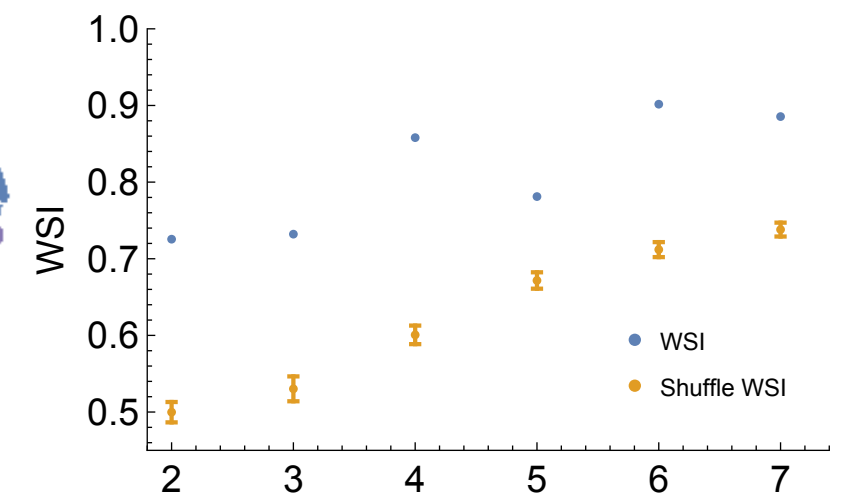

B

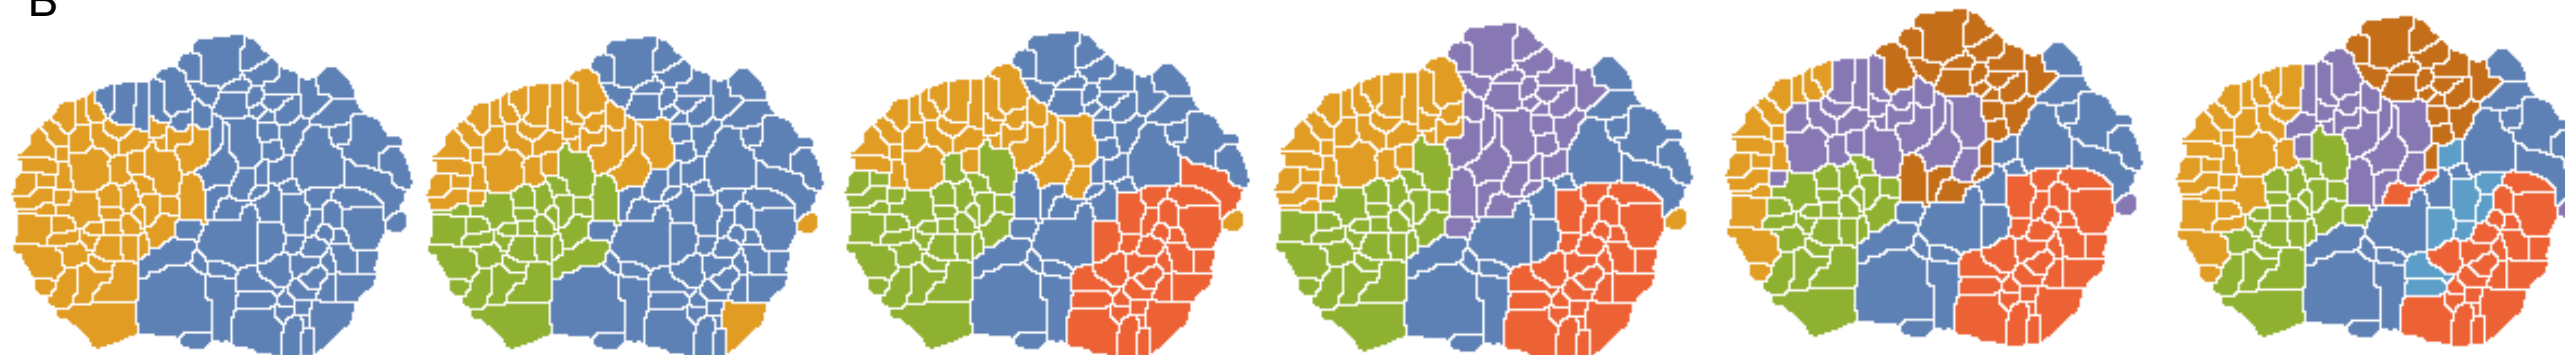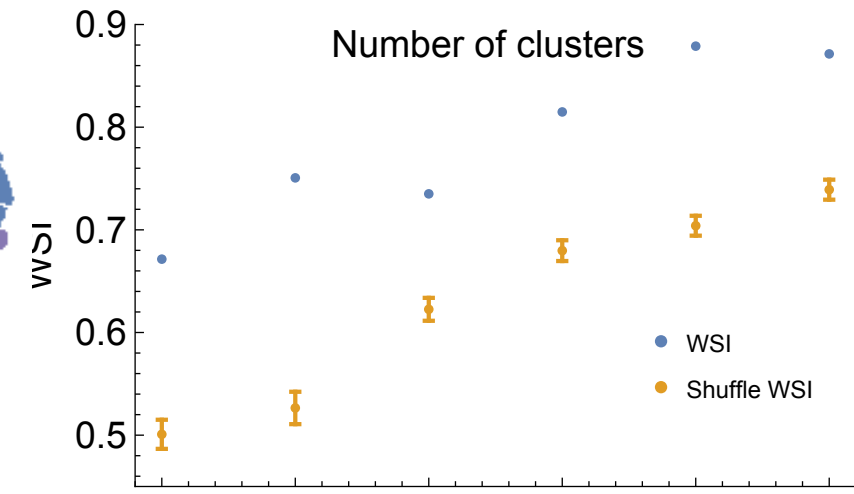

C

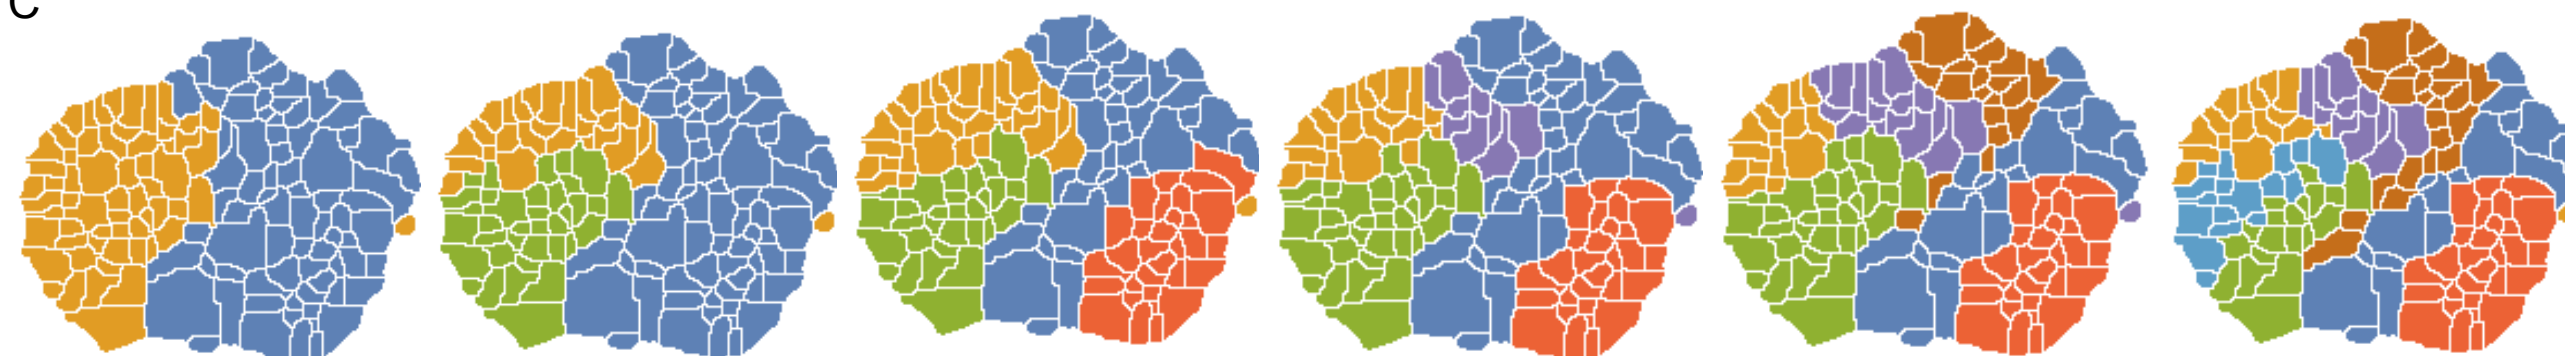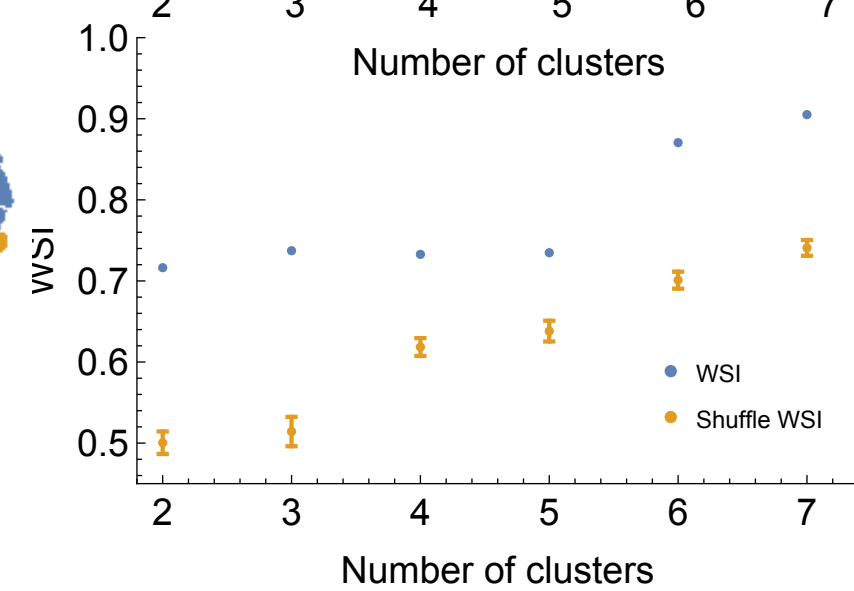

Supplement: supp [file elife-61806-supp-v1.zip]

A

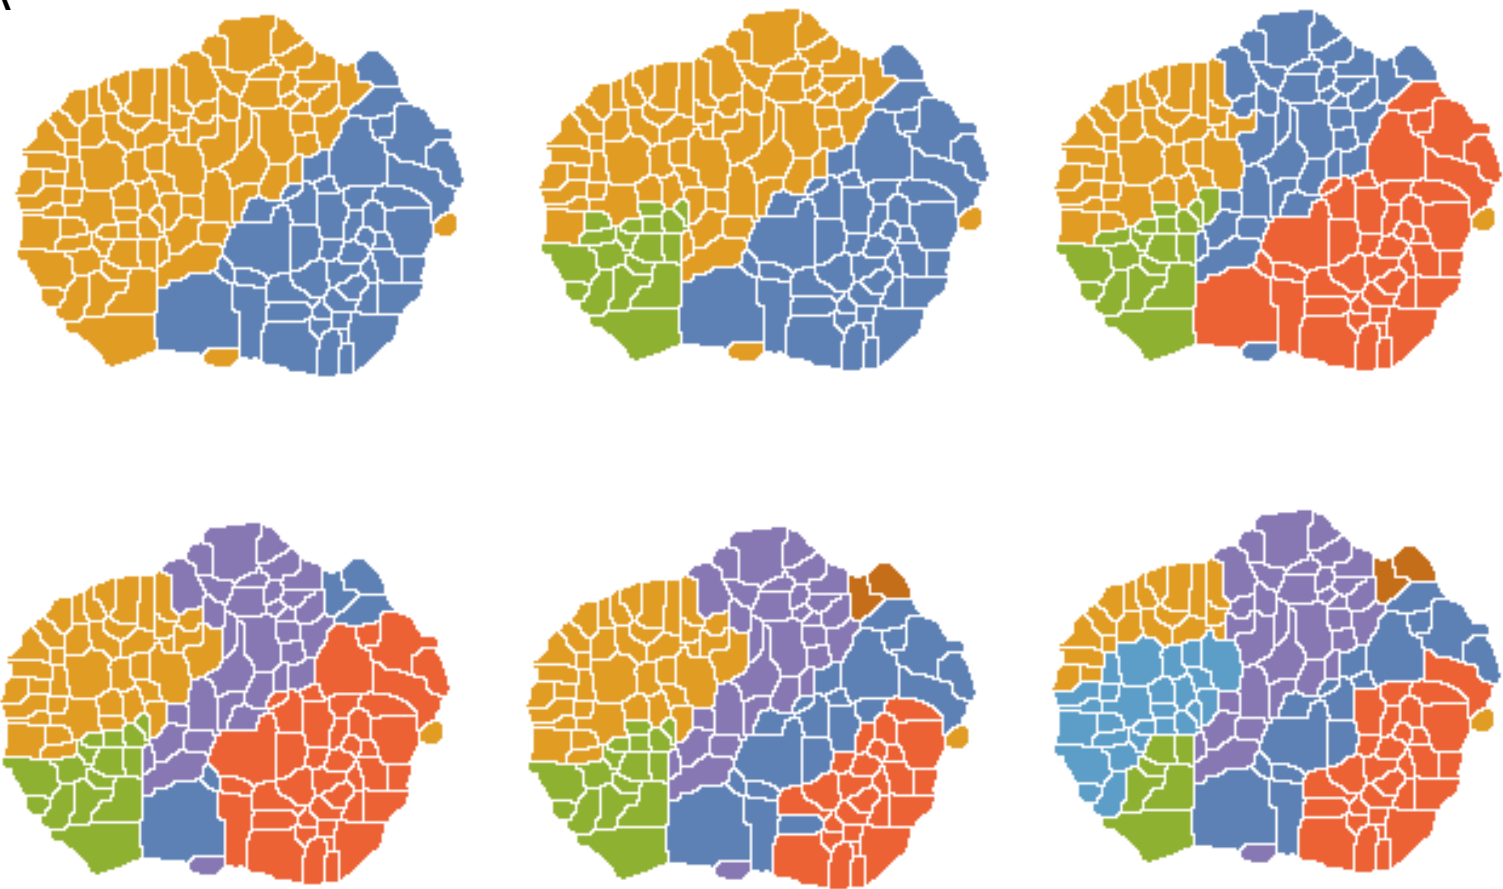

B

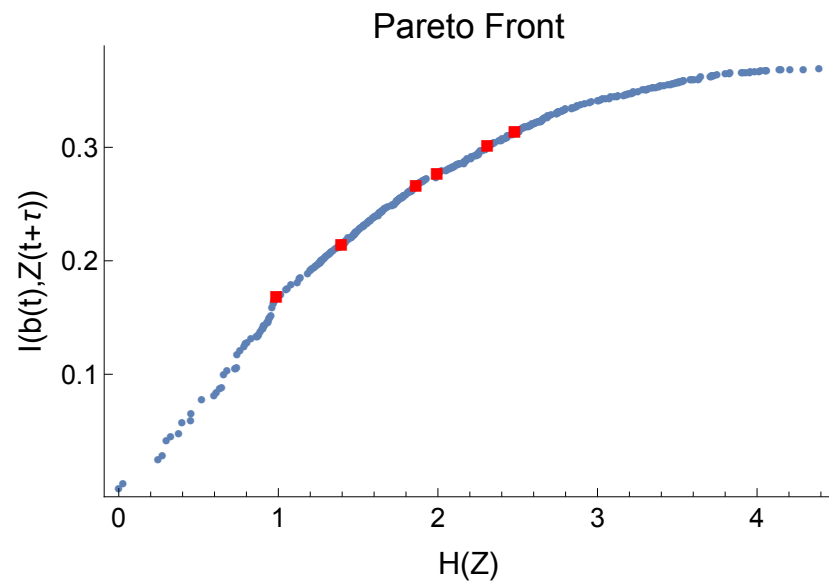

Supplement: supp [file elife-61806-supp-v1.zip]

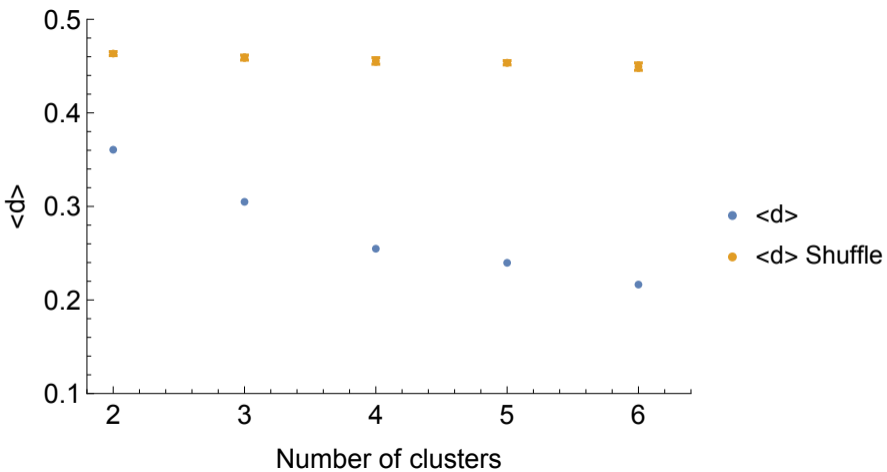

Supplement: supp [file elife-61806-supp-v1.zip]
